# Supplementary material for: Unraveling cooperative interactions between complexed ions in dual-host strategy for cesium salt separation
Source: publisher site journal article supplement (doi:10.3762/bjoc.21.68), 2025-04-29
Supplement: Additional file 1 [file 1860-5397-21-68-S1.pdf]

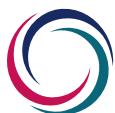

## Supporting Information

for

### Unraveling cooperative interactions between complexed ions in dual-host strategy for cesium salt separation

Zhihua Liu, Ya-Zhi Chen, Ji Wang, Qingling Nie, Wei Zhao and Biao Wu

*Beilstein J. Org. Chem.* **2025**, 21, 845–853. doi:10.3762/bjoc.21.68

### Nuclear magnetic resonance (NMR), mass and X-ray diffraction data

***Table of contents:***

- S1. General information
- S2. X-ray diffraction single crystal structures
- S3.  $^1\text{H}$  NMR titration studies
- S4. Solid–liquid extraction experiments
- S5. Mass spectrometry
- S6. IGM analysis

## **S1. General information**

All starting materials and solvents were ordered from commercial sources (Beijing InnoChem, Aladdin, Macklin Science & Technology Co., Ltd.) and used without further purification.  $^1\text{H}$  and  $^{13}\text{C}$  NMR spectra were recorded on a Bruker AVANCE AV II-400/500 MHz spectrometer at 298 K.  $^1\text{H}$  NMR chemical shifts were reported relative to residual solvent peaks ( $^1\text{H}$  NMR: 2.50 ppm for DMSO- $d_6$ , 7.26 ppm for  $\text{CDCl}_3$ ;  $^{13}\text{C}$  NMR: 39.52 ppm for DMSO- $d_6$ , 77.1 ppm for  $\text{CDCl}_3$ ). High resolution mass spectrometry data were obtained by a Bruker micro TOF-Q II ESI-Q-TOF LC/MS/MS. Single crystal X-ray data were measured on a Bruker D8 Venture Photon II diffractometer. The anion concentration in aqueous solution was recorded by Shine ion chromatography (CIC-D100, China). All aqueous solutions were prepared by using ultrapure water ( $18.25\text{ M}\Omega\cdot\text{cm}$ ).

The cesium phosphate salts are not commercially available and were prepared by acid-base reaction from corresponding cesium hydroxide and phosphoric acid. The phosphoric acid ( $\text{H}_3\text{PO}_4$ ) was placed in a small vial and certain amounts of hydroxide was added. The mixture was diluted to 1 mL and the prepared solution was used directly.  $\text{Cs}_3\text{PO}_4$  (water):  $\text{H}_3\text{PO}_4$  was mixed with three equivalents of  $\text{CsOH}$  (40% wt,  $\text{H}_2\text{O}$ ).

## **S2. X-ray diffraction single crystal structures**

$[\text{Cs}(\text{18-crown-6})]_2\text{SO}_4$  (12  $\mu\text{L}$  or 18  $\mu\text{L}$ , 0.625 mol/L, prepared by mixing  $\text{Cs}_2\text{SO}_4$  with 2 equivalents of 18-crown-6) was added to a suspension of **L** (16 mg) in acetonitrile (1 mL) and acetone (1 mL). After stirring overnight at room temperature, the solution was centrifugated. The obtained clear solution was used for crystal growing. Slow vapor diffusion of diethyl ether into above-mentioned solution provided yellow crystals of  $\text{L}\cdot\text{18-crown-6}\cdot\text{Cs}_2\text{SO}_4$  within one week.

$[\text{Cs}(\text{18-crown-6})]_2\text{CO}_3$  (9  $\mu\text{L}$ , 0.625 mol/L, prepared by mixing  $\text{Cs}_2\text{CO}_3$  with 2 equivalents of 18-crown-6) was added to a suspension of **L** (12 mg) in acetonitrile (1 mL) and acetone (1 mL). After stirring overnight at room temperature, the solution was centrifugated. The obtained clear solution was used for crystal growing. Slow vapor diffusion of diethyl ether into the above-mentioned solution provided yellow crystals of  $\text{L}\cdot\text{18-crown-6}\cdot\text{Cs}_2\text{CO}_3$  within one week.

$[\text{Cs}(\text{18-crown-6})]_3\text{PO}_4$  (22  $\mu\text{L}$ , 0.616 mol/L, prepared by mixing  $\text{Cs}_3\text{PO}_4$  with 3 equivalents of 18-crown-6) was added to a suspension of **L** (12 mg) in acetonitrile (1 mL) and acetone (1 mL). After stirring overnight at room temperature, the solution was centrifugated. The obtained clear solution was used for crystal growing. Slow vapor

diffusion of diethyl ether into above-mentioned solution provided white crystals of  $\text{L}\cdot\text{18-crown-6}\cdot\text{Cs}_3\text{PO}_4$  within one week.

**Table S1.** Crystal data details for obtained structures.

| Complex                               | $\text{L}\cdot\text{18-C-6}\cdot\text{Cs}_2\text{SO}_4$                   | $\text{L}\cdot\text{18-C-6}\cdot\text{Cs}_2\text{CO}_3$           | $\text{L}\cdot\text{18-C-6}\cdot\text{Cs}_3\text{PO}_4$                       |
|---------------------------------------|---------------------------------------------------------------------------|-------------------------------------------------------------------|-------------------------------------------------------------------------------|
| Empirical formula                     | $\text{C}_{78}\text{H}_{84}\text{Cs}_2\text{N}_{16}\text{O}_{31}\text{S}$ | $\text{C}_{61}\text{H}_{72}\text{Cs}_2\text{N}_{16}\text{O}_{21}$ | $\text{C}_{182}\text{H}_{268}\text{Cs}_6\text{N}_{36}\text{O}_{71}\text{P}_2$ |
| CCDC                                  | 2411573                                                                   | 2411574                                                           | 2411575                                                                       |
| Formula weight                        | 2039.49                                                                   | 3882.54                                                           | 3882.54                                                                       |
| Crystal system                        | Monoclinic                                                                | Monoclinic                                                        | Triclinic                                                                     |
| Space group                           | $P2_1/n$                                                                  | $P2_1/n$                                                          | $P-1$                                                                         |
| $a$ (Å)                               | 15.3688(19)                                                               | 19.0373(8)                                                        | 15.4237(2)                                                                    |
| $b$ (Å)                               | 21.192(3)                                                                 | 22.1519(9)                                                        | 16.2180(2)                                                                    |
| $c$ (Å)                               | 29.312(4)                                                                 | 19.0940(8)                                                        | 22.8955(3)                                                                    |
| $\alpha$ (deg)                        | 90                                                                        | 90                                                                | 77.3610(10)                                                                   |
| $\beta$ (deg)                         | 104.965(5)                                                                | 116.5470                                                          | 88.8450(10)                                                                   |
| $\gamma$ (deg)                        | 90                                                                        | 90                                                                | 86.5290(10)                                                                   |
| $V$ (Å <sup>3</sup> )                 | 9223(2)                                                                   | 7203.2(5)                                                         | 5577.95(13)                                                                   |
| $Z$                                   | 4                                                                         | 4                                                                 | 1                                                                             |
| $T$ (K)                               | 180                                                                       | 180                                                               | 180                                                                           |
| $F(000)$                              | 4152.0                                                                    | 3312.0                                                            | 2540.0                                                                        |
| $D_{\text{calc}}$ , g/cm <sup>3</sup> | 1.469                                                                     | 1.094                                                             | 1.475                                                                         |
| Total no. of data                     | 17017                                                                     | 13284                                                             | 19654                                                                         |
| Completeness to $\theta$              | 0.999                                                                     | 1.000                                                             | 1.000                                                                         |
| $\theta$ range                        | 2.229-25.436                                                              | 2.191-25.421                                                      | 2.221-25                                                                      |
| $\mu$ /mm <sup>-1</sup>               | 0.900                                                                     | 1.094                                                             | 1.081                                                                         |
| Data/restraints/<br>Parameters        | 17017/88/1167                                                             | 13284/51/909                                                      | 19654/995/1406                                                                |
| GoF on $F^2$                          | 1.027                                                                     | 1.041                                                             | 1.081                                                                         |
| $R1$                                  | 0.0510                                                                    | 0.0627                                                            | 0.0384                                                                        |
| $wR2$                                 | 0.061                                                                     | 0.1765                                                            | 0.1042                                                                        |

**Table S2.** Hydrogen bonding information in the crystal structure of L • 18-C-6•Cs<sub>2</sub>SO<sub>4</sub>.

| <i>D-H...A</i> | <i>d (D-H)</i> | <i>d (H...A)</i> | <i>d (D...A)</i> | $\angle DHA$ |
|----------------|----------------|------------------|------------------|--------------|
| N2-H2...O28    | 0.88           | 2.12             | 2.924            | 151          |
| N3-H3...O30    | 0.88           | 2.05             | 2.872            | 155          |
| N4-H4...O30    | 0.88           | 2.08             | 2.873            | 149          |
| N5-H5...O31    | 0.88           | 2.43             | 2.766            | 103          |
| N6-H6...O28    | 0.88           | 1.93             | 2.77             | 159          |
| N7-H7...O39    | 0.88           | 2.16             | 2.941            | 148          |
| N8-H8...O29    | 0.88           | 1.96             | 2.941            | 158          |
| N9-H9...O30    | 0.88           | 2.18             | 2.941            | 151          |
| N10-H10...O28  | 0.88           | 2.38             | 2.941            | 107          |
| N11-H11...O28  | 0.88           | 1.9              | 2.941            | 164          |
| N12-H12...O31  | 0.88           | 2.13             | 2.941            | 151          |

**Table S3.** Hydrogen bonding information in the crystal structure of L • 18-C-6•Cs<sub>2</sub>CO<sub>3</sub>.

| <i>D-H...A</i> | <i>d (D-H)</i> | <i>d (H...A)</i> | <i>d (D...A)</i> | $\angle DHA$ |
|----------------|----------------|------------------|------------------|--------------|
| N2-H2...O19    | 0.88           | 2.12             | 2.924            | 151          |
| N3-H3...O19    | 0.88           | 2.05             | 2.872            | 155          |
| N4-H4...O21    | 0.88           | 2.08             | 2.873            | 149          |
| N5-H5...O21    | 0.88           | 2.43             | 2.766            | 103          |
| N7-H7...O21    | 0.88           | 1.93             | 2.77             | 159          |
| N8-H8...O21    | 0.88           | 2.16             | 2.941            | 148          |
| N9-H9...O20    | 0.88           | 1.96             | 2.798            | 158          |
| N10-H10...O20  | 0.88           | 2.18             | 2.983            | 151          |
| N12-H12...O20  | 0.88           | 2.38             | 2.765            | 107          |
| N13-H13...O20  | 0.88           | 1.9              | 2.757            | 164          |
| N14-H14...O19  | 0.88           | 2.13             | 2.936            | 151          |
| N15-H15...O19  | 0.88           | 1.91             | 2.762            | 161          |

**Table S4.** Hydrogen bonding information in the crystal structure of  $L \cdot 18\text{-C-}6 \cdot \text{Cs}_3\text{PO}_4$ .

| $D\text{-H}\cdots A$ | $d(D\text{-H})$ | $d(H\cdots A)$ | $d(D\cdots A)$ | $\angle DHA$ |
|----------------------|-----------------|----------------|----------------|--------------|
| N1-H1 $\cdots$ O6    | 0.88            | 1.98           | 2.776          | 151          |
| N3-H3 $\cdots$ O10   | 0.88            | 1.97           | 2.819          | 162          |
| N4-H4 $\cdots$ O4    | 0.88            | 1.89           | 2.759          | 170          |
| N5-H5 $\cdots$ O4    | 0.88            | 1.92           | 2.773          | 162          |
| N6-H6 $\cdots$ O8    | 0.88            | 1.92           | 2.795          | 170          |
| N7-H7 $\cdots$ O10   | 0.88            | 2.04           | 2.829          | 149          |
| N8-H8 $\cdots$ O6    | 0.88            | 1.85           | 2.716          | 168          |
| N9-H9 $\cdots$ O8    | 0.88            | 1.91           | 2.769          | 164          |
| N10-H10 $\cdots$ O4  | 0.88            | 2.02           | 2.833          | 153          |
| N12-H12 $\cdots$ O8  | 0.88            | 2.44           | 2.784          | 104          |
| N14-H14 $\cdots$ O6  | 0.88            | 2.03           | 2.847          | 153          |
| N14-H14 $\cdots$ O10 | 0.88            | 2.48           | 2.812          | 103          |
| N16-H16 $\cdots$ O10 | 0.88            | 2.05           | 2.84           | 148          |

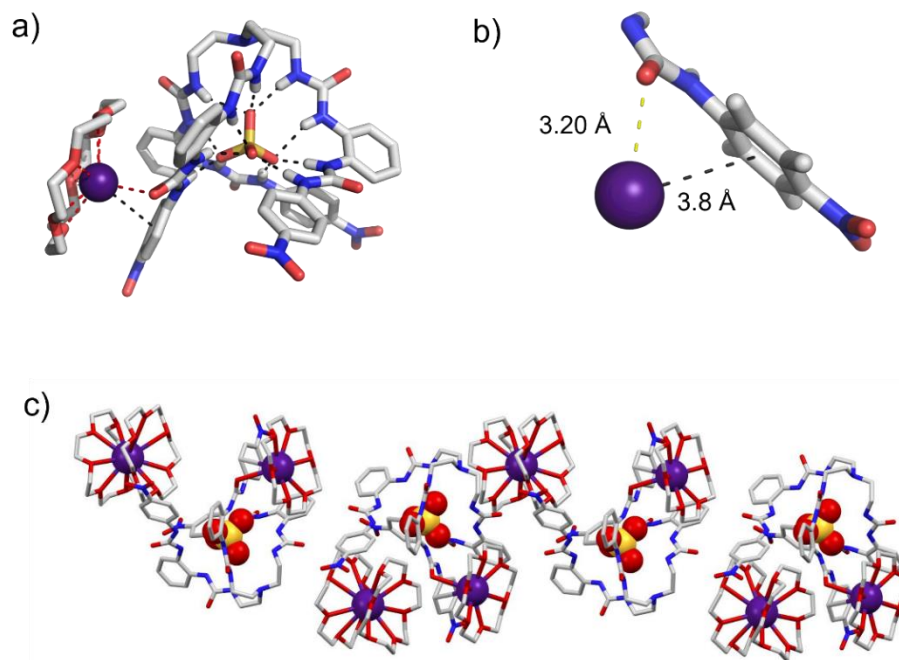

**Figure S1.** a) Single-crystal structure of the complex  $L \cdot 18\text{-crown-}6 \cdot \text{Cs}_2\text{SO}_4$ , the overall stoichiometry of  $\text{Cs}^+$ ,  $\text{SO}_4^{2-}$ , 18-crown-6 and anion receptor is 4:2:5:2. b) Cs enhances structural stability by facilitating ion- $\pi$  interactions and oxygen interactions with the urea-carbonyl moiety of the ligand. c) Crystal packing arrangement showing interactions among 18-crown-6 ether,  $\text{Cs}^+$ , and  $L \cdot \text{SO}_4^{2-}$  complex.

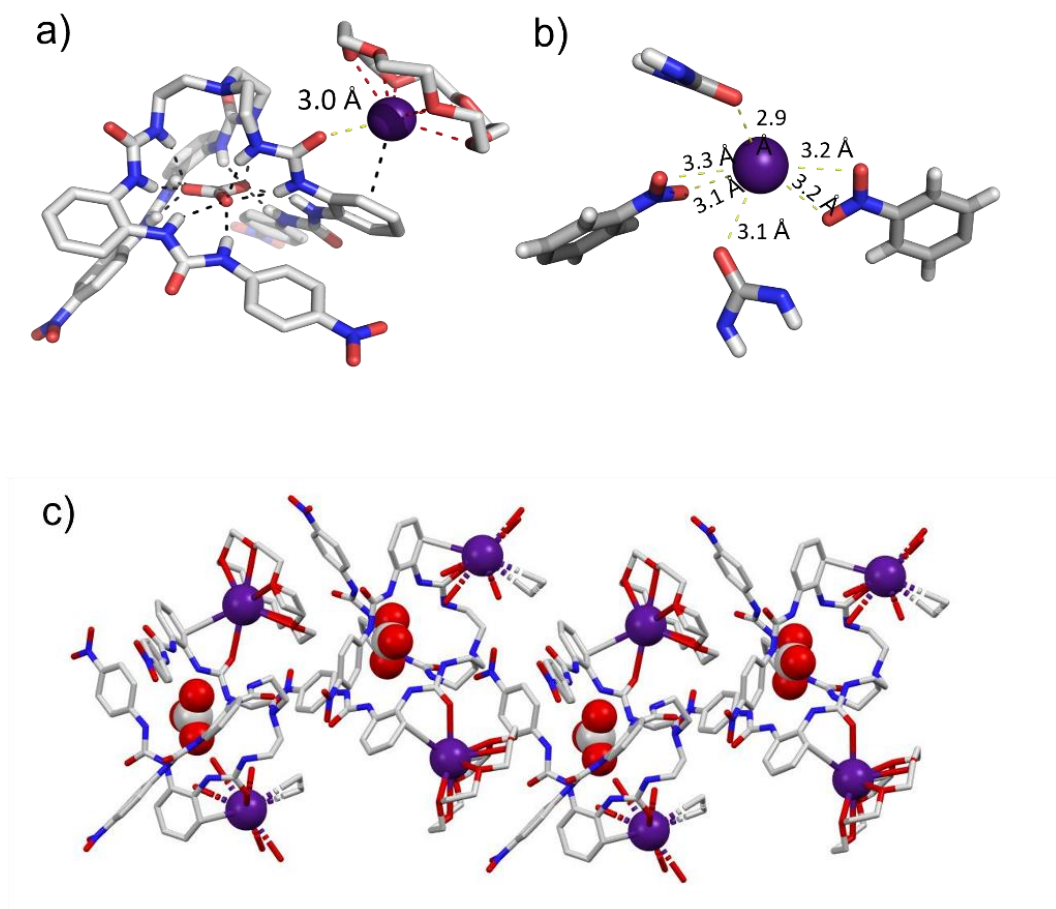

**Figure S2.** a) Single-crystal structure of the complex  $L \cdot 18\text{-crown-6} \cdot \text{Cs}_2\text{CO}_3$ , the overall stoichiometry of  $\text{Cs}^+$ ,  $\text{CO}_3^{2-}$ , 18-crown-6 and anion receptor is 2:1:1:1. b) Cs enhances the structural stability by interacting with the adjacent ureido carbonyl oxygen atom and the terminal nitro group oxygen atom. c) Crystal packing arrangement showing interactions among 18-crown-6 ether,  $\text{Cs}^+$ , and  $L \cdot \text{CO}_3^{2-}$  complex.

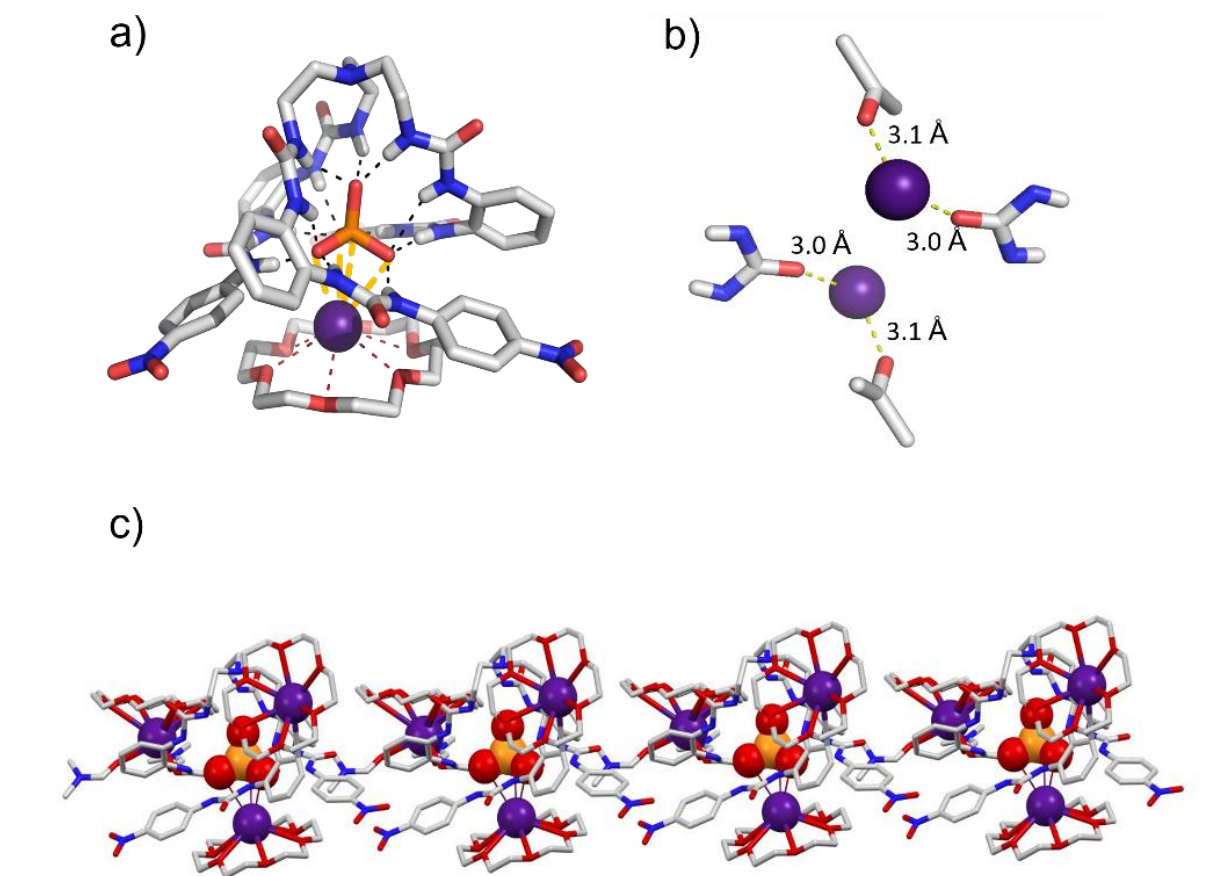

**Figure S3.** a) Single-crystal structure of the complex L•18-crown-6•Cs<sub>3</sub>PO<sub>4</sub>, the overall stoichiometry of Cs<sup>+</sup>, PO<sub>4</sub><sup>3-</sup>, 18-crown-6 and anion receptor is 3:1:3:1. One oxygen atom of the phosphate group points towards the nitrogen atom of the TREN, with three oxygen atoms pointing downwards to form a tetrahedron. b) Cs enhances structural stability by interacting with the ureido carbonyl oxygen atoms and acetone oxygen atoms. c) Crystal packing arrangement showing interactions among 18-crown-6 ether, Cs<sup>+</sup>, and L•PO<sub>4</sub><sup>3-</sup> complex.



### S3. <sup>1</sup>H NMR titration studies

For a slow titration, such as titrating a ligand by adding carbonate anion as tetrabutylammonium salt (TBA<sub>2</sub>CO<sub>3</sub>), the equilibrium reaction equation can be represented as follows:

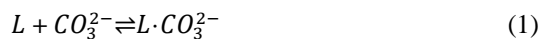

For the calculation, we define these:

$$x = [L \cdot (CO_3^{2-})] + [CO_3^{2-}]$$

$$y = [L \cdot (CO_3^{2-})]$$

$$a = [L]$$

the competitive equilibrium constant K can be represented as

$$K = \frac{[L \cdot (CO_3^{2-})]}{[L \cdot (CO_3^{2-})] \cdot [CO_3^{2-}]} = \frac{y}{(a-y) \cdot (x-y)} \quad (2)$$

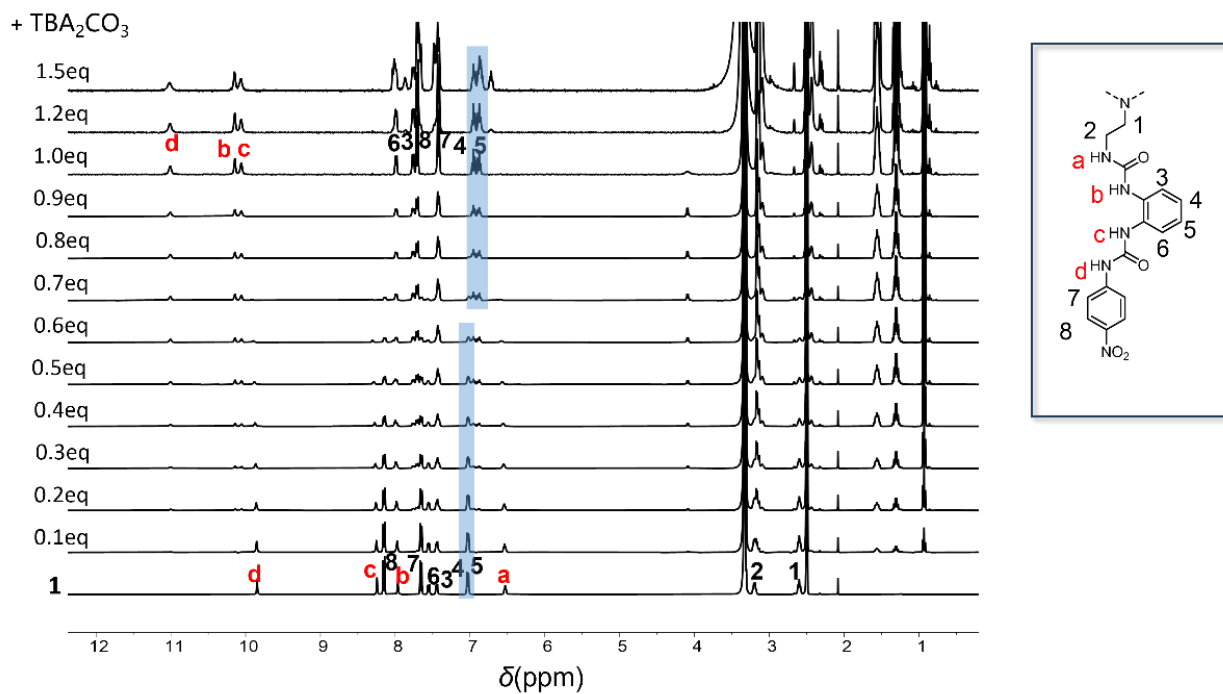

**Figure S4.** Stacked <sup>1</sup>H NMR spectra (400 MHz, 298 K, DMSO-*d*<sub>6</sub>) of receptor L (2 mM) by adding carbonate anion as tetrabutylammonium salt (TBA<sub>2</sub>CO<sub>3</sub>, 50 mM).

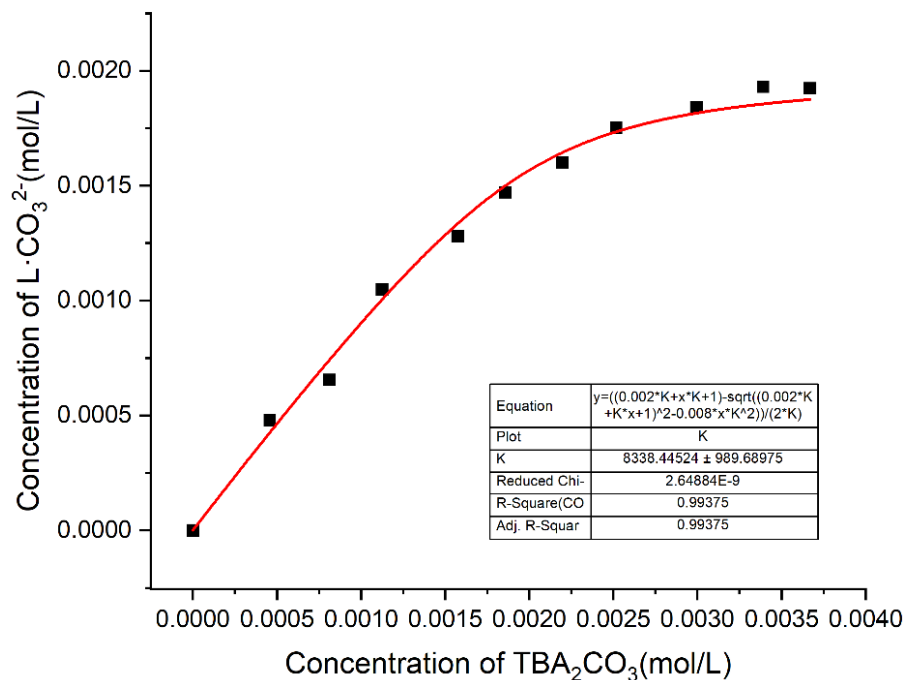

**Figure S5.** Fitted binding curve for the anion receptor by adding carbonate salts as determined by using the above-mentioned equation (2).

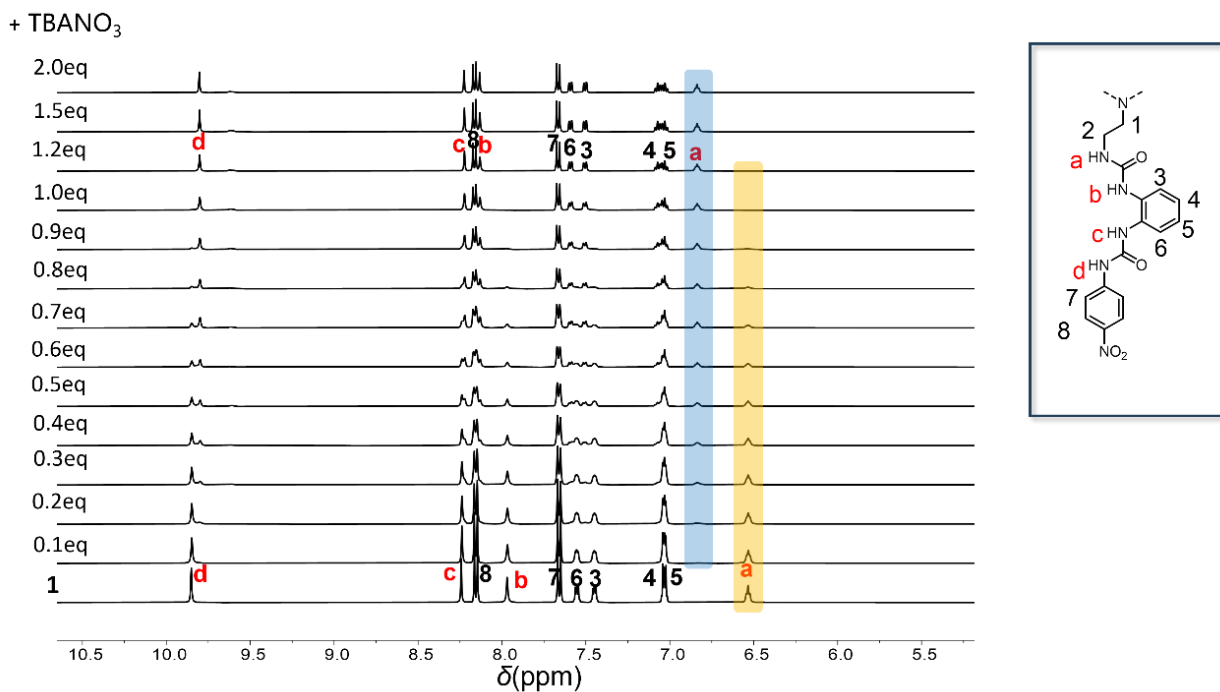

**Figure S6.** Stacked <sup>1</sup>H NMR spectra (500 MHz, 298 K, DMSO-*d*<sub>6</sub>) of receptor L (2 mM) by adding nitrate anion as tetrabutylammonium salt (TBANO<sub>3</sub>, 50 mM).

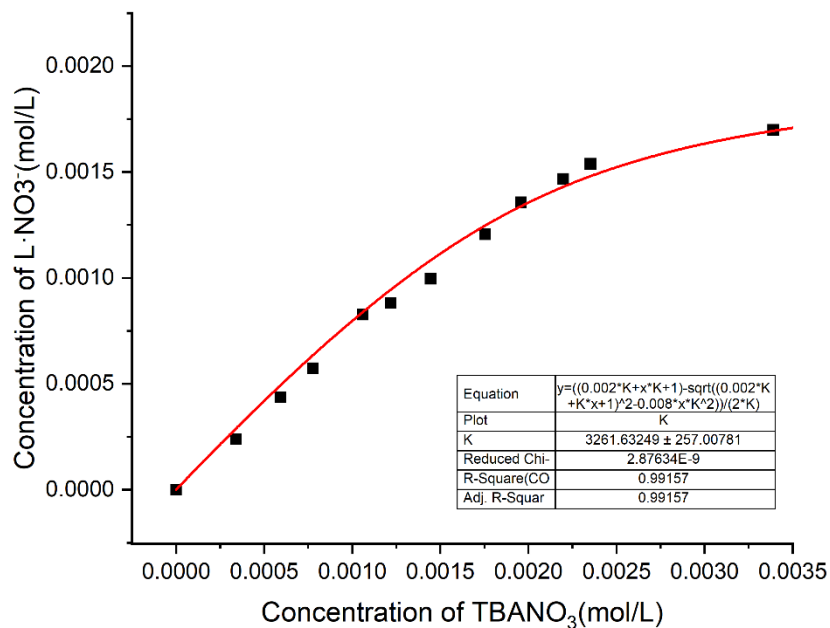

**Figure S7.** Fitted binding curve for the anion receptor by adding nitrate salts as determined by using the above-mentioned equation (2).

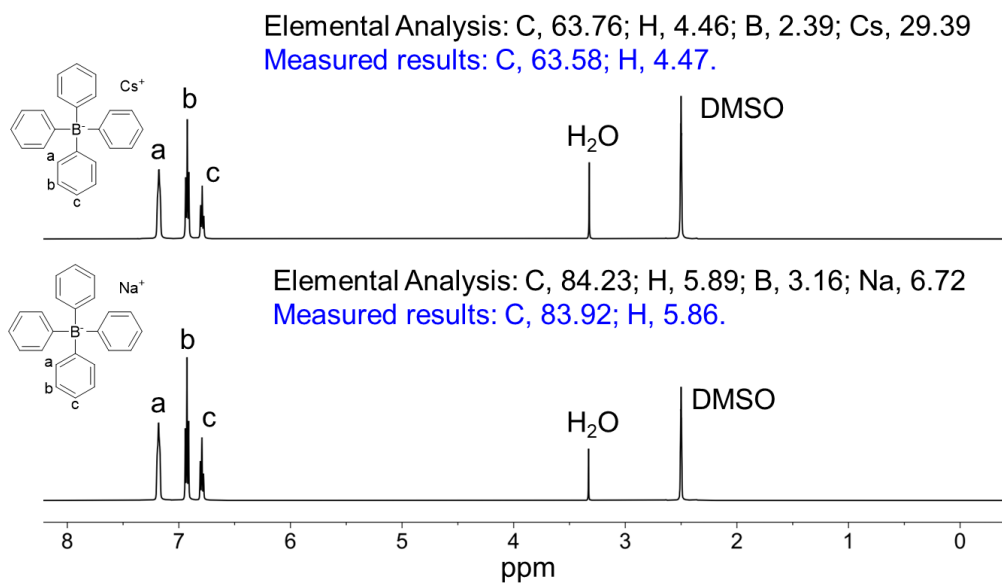

**Figure S8.** Stacked  $^1\text{H}$  NMR spectra of cesium and sodium tetraphenylborate (1 mM, 400 MHz,  $\text{DMSO-}d_6$ , 298 K).

As for the negligible  $^1\text{H}$  NMR signal changes, elemental analysis experiments were conducted suggesting clear changes in C and H populations (color in blue).

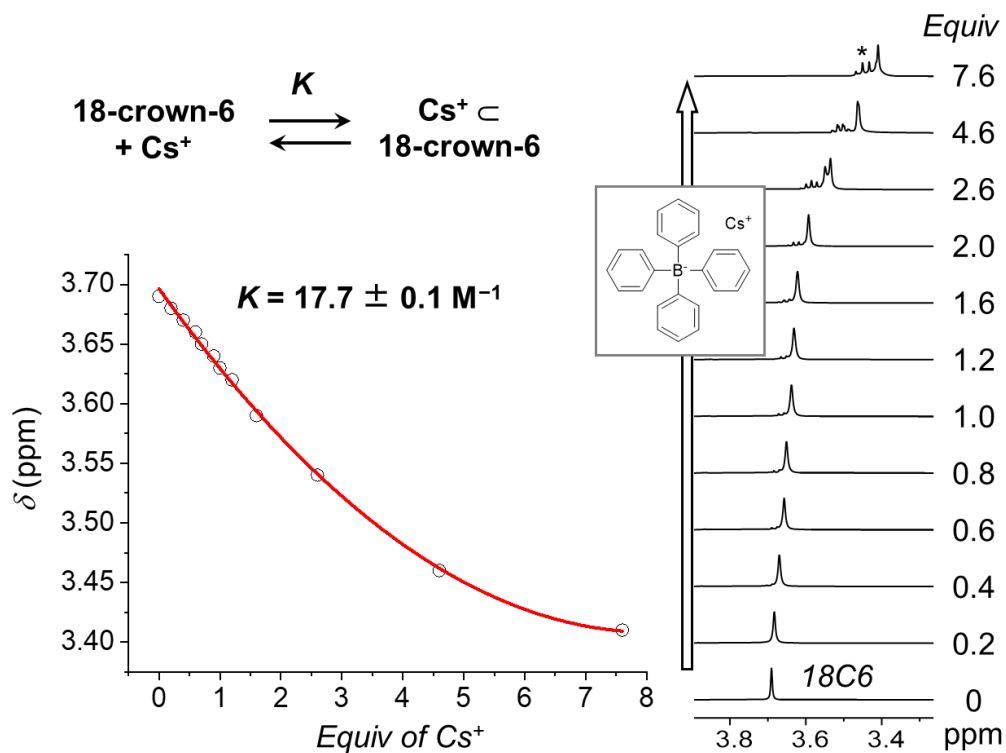

**Figure S9.** Stacked <sup>1</sup>H NMR spectra of 18-crown-6 by adding cesium tetraphenylborate salts (1 mM, 400 MHz, CDCl<sub>3</sub>, 298 K) and its fitted binding curve as determined from online Bindfit website, <http://app.supramolecular.org/bindfit/view/246be877-40d2-43d1-9067-371315f4428e>. The calculated binding constants of free 18-crown-6 with Cs<sup>+</sup> cation is  $17.7 \pm 0.1 \text{ M}^{-1}$ . \* indicates residual ethyl ether. It is noted that the determined cesium binding affinity is clearly weaker than previously reported results ( $> 10^4 \text{ M}^{-1}$  in CH<sub>3</sub>CN, Elizabeth, M. et al., *J. Phys. Chem.* **1977**, 81, 1677–1681; Takeda, Y. *Bull. Chem. Soc. Jpn.* **1981**, 54, 3133–3136.). This is likely due to that reverse titration (adding 18-crown-6 into the solution of CsBPh<sub>4</sub>) is conducted before, where the 2:1 complex may form in acetonitrile and give a much stronger binding affinity.

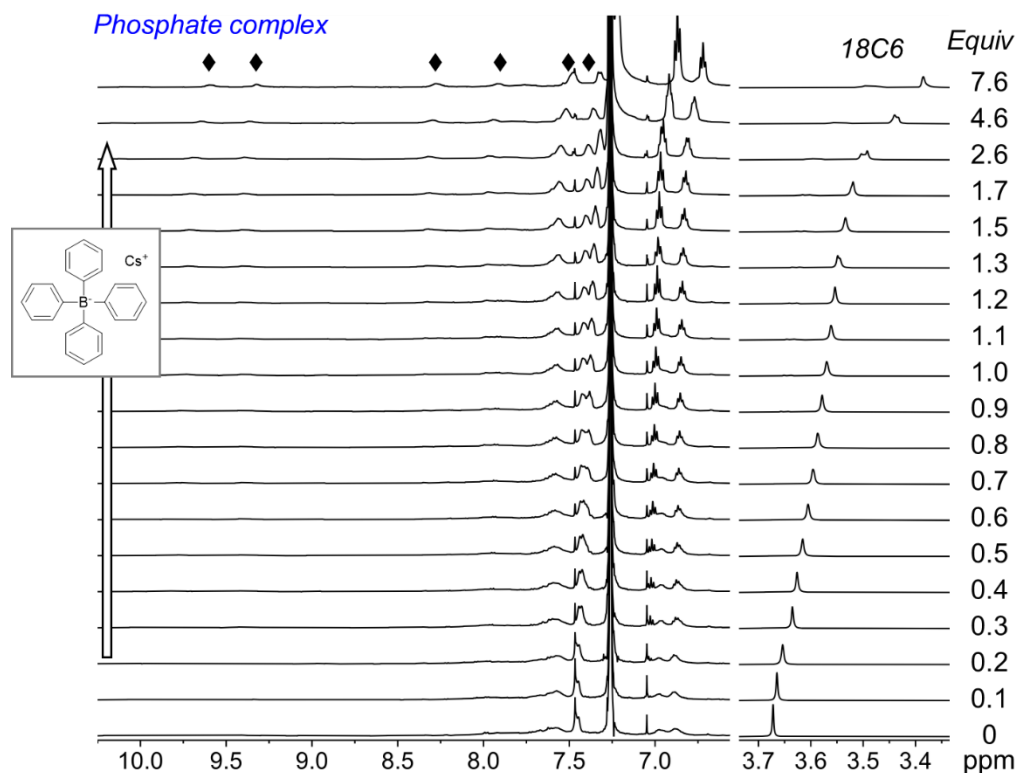

**Figure S10.** Stacked  $^1\text{H}$  NMR spectra of 18-crown-6 by adding cesium tetraphenylborate salts with the presence of one equivalent of phosphate-hexaurea complex (1 mM, 400 MHz,  $\text{CDCl}_3$ , 298 K). Tetrabutylammonium phosphate salts were used.  $\blacklozenge$  indicates the phosphate-hexaurea complex.

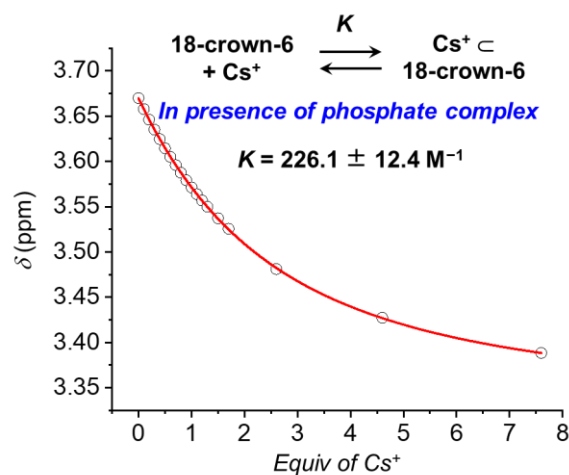

**Figure S11.** Fitted binding curve for the  $\text{Cs}^+$  binding of 18-crown-6 with the presence of phosphate-hexaurea complex as determined from online Bindfit website, <http://app.supramolecular.org/bindfit/view/d60a6112-7c2a-4a75-9685-919c6e40b8b1>. The calculated binding constant is  $226.1 \pm 12.4 \text{ M}^{-1}$ .

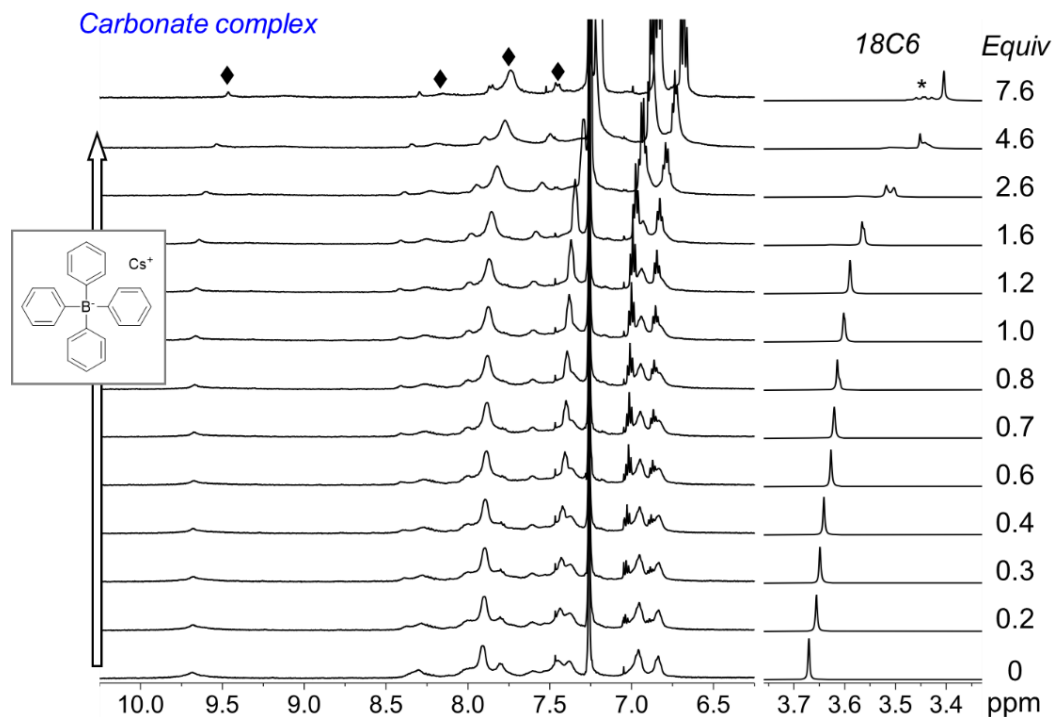

**Figure S12.** Stacked  $^1\text{H}$  NMR spectra of 18-crown-6 by adding cesium tetraphenylborate salts with the presence of one equivalent of carbonate-hexaurea complex (1 mM, 400 MHz,  $\text{CDCl}_3$ , 298 K). Tetrabutylammonium carbonate salts were used.  $\blacklozenge$  indicates the carbonate-hexaurea complex, \* indicates residual ethyl ether.

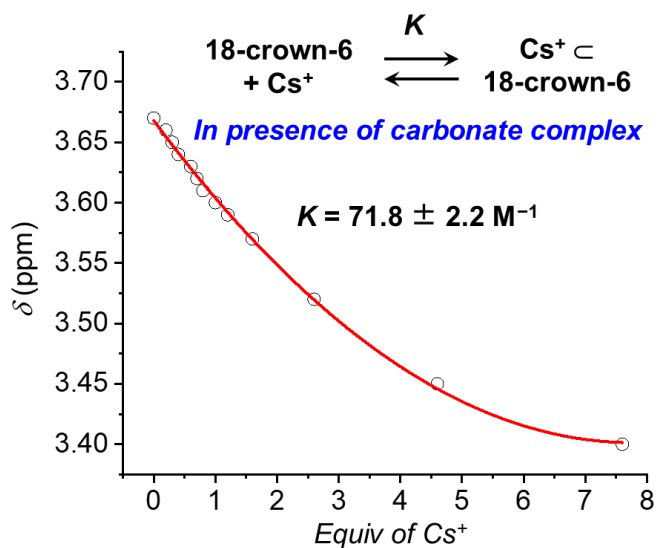

**Figure S13.** Fitted binding curve for the  $\text{Cs}^+$  binding of 18-crown-6 with the presence of carbonate-hexaurea complex as determined from online Bindfit website, <http://app.supramolecular.org/bindfit/view/2b59538e-ce44-45a9-8abf-571f839e9e8e>. The calculated binding constant is  $71.8 \pm 2.2 \text{ M}^{-1}$ .

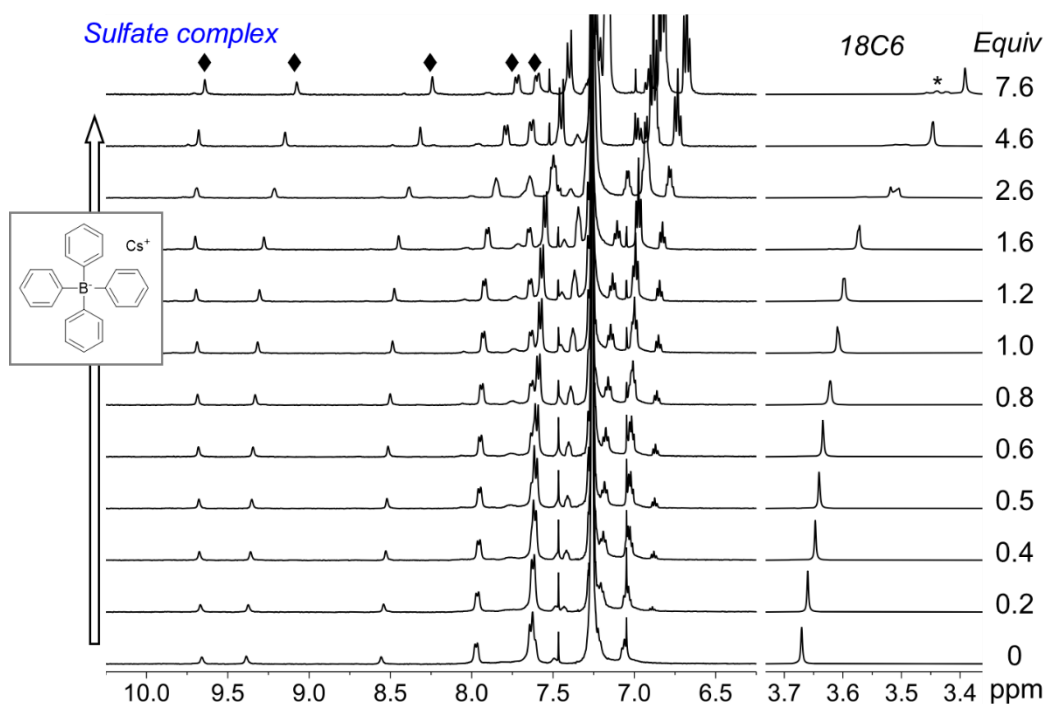

**Figure S14.** Stacked  $^1\text{H}$  NMR spectra of 18-crown-6 by adding cesium tetraphenylborate salts with the presence of one equivalent of sulfate-hexaurea complex (1 mM, 400 MHz,  $\text{CDCl}_3$ , 298 K). Tetrabutylammonium sulfate salts were used.  $\blacklozenge$  indicates the sulfate-hexaurea complex, \* indicates residual ethyl ether.

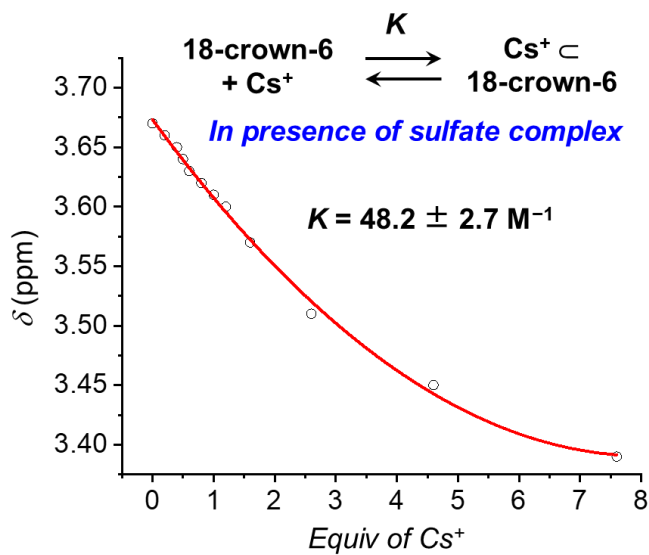

**Figure S15.** Fitted binding curve for the  $\text{Cs}^+$  binding of 18-crown-6 with the presence of sulfate-hexaurea complex as determined from online Bindfit website, <http://app.supramolecular.org/bindfit/view/84b55e2c-5f66-433a-b9d6-74962d8d42c4>. The calculated binding constant is  $48.2 \pm 2.7 \text{ M}^{-1}$ .

#### S4. Solid-liquid extraction experiments

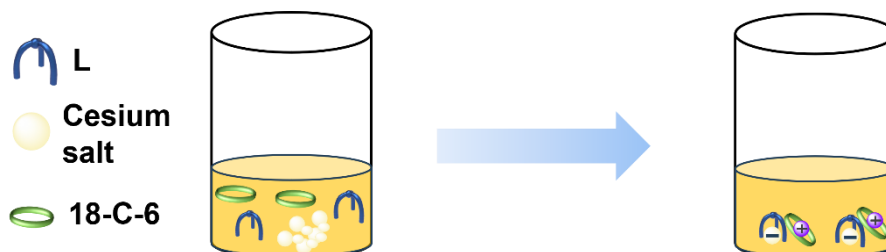

**Figure S16.** Diagram for solid-liquid extraction.

General solid–liquid extraction procedure: to a the acceptor solution (4.5 mM, 10 mL,  $\text{CHCl}_3$ ), adding alkali metal cation solids (such as  $\text{CsCl}$ ,  $\text{CsNO}_3$ ,  $\text{Cs}_2\text{CO}_3$ ,  $\text{Cs}_2\text{SO}_4$ ,  $\text{Cs}_3\text{PO}_4$ ). The added amount of cesium salts contains equivalent amount of anion by comparing to the hexaurea receptor. The solution is a yellow suspension. Mixing the prepared solution mixture and starting at 30 °C for 0.5 hours at a stirring speed of 1500 r/min. The solution and the insoluble solid are separated by centrifugation. The organic layer is carefully collected and dissolved in  $\text{DMSO-}d_6$  for  $^1\text{H}$  NMR analysis. The bottom sediment is washed with regular  $\text{CHCl}_3$  (2 mL  $\times$  3) and redissolved in water (5 mL) by using a volumetric flask. An aqueous solution (0.5 mL) is taken and subjected to a 0.2  $\mu\text{M}$  syringe filter, then the obtained aqueous solution is charged for ion chromatography to determine cation centration.

**Table S5.** Summary of IC results containing hexaurea receptor and 18-crown-6 for the solid–liquid extractions of cesium ions.

| Cesium salts             | Initial $\text{Cs}^+$<br>concentration(mM) | After<br>extraction(mM) | Extraction<br>efficiency |
|--------------------------|--------------------------------------------|-------------------------|--------------------------|
| $\text{CsCl}$            | 4.33                                       | 0.79                    | 81.8%                    |
| $\text{CsNO}_3$          | 5.16                                       | 3.29                    | 36.2%                    |
| $\text{Cs}_2\text{CO}_3$ | 8.74                                       | 3.39                    | 61.2%                    |
| $\text{Cs}_2\text{SO}_4$ | 8.03                                       | 4.76                    | 40.8%                    |
| $\text{Cs}_3\text{PO}_4$ | 13.46                                      | ND                      | 100%                     |



**Table S6.** The IC results of different cations extracted by the solid-liquid extraction method with the presence of hexaurea receptor and 18-crown-6.

| Chloride salts | Initial Cl <sup>-</sup><br>concentration(mM) | After<br>extraction(mM) | Extraction<br>efficiency |
|----------------|----------------------------------------------|-------------------------|--------------------------|
| NaCl           | 5.75                                         | 3.19                    | 44.5%                    |
| KCl            | 5.80                                         | 1.79                    | 69.1%                    |
| CsCl           | 5.76                                         | 0.51                    | 91.2%                    |
| LiCl           | 5.78                                         | ND                      | 100%                     |

**Table S7.** Summary of IC results solid-liquid extraction of cesium ions by only adding anion receptor.

| Cesium salts                    | Initial Cs <sup>+</sup><br>concentration(mM) | After<br>extraction(mM) | Extraction<br>efficiency |
|---------------------------------|----------------------------------------------|-------------------------|--------------------------|
| CsCl                            | 4.33                                         | 3.88                    | 10.4%                    |
| CsNO <sub>3</sub>               | 5.16                                         | 4.48                    | 13.2%                    |
| Cs <sub>2</sub> CO <sub>3</sub> | 8.74                                         | 7.87                    | 10.0%                    |
| Cs <sub>2</sub> SO <sub>4</sub> | 8.03                                         | 7.72                    | 3.9%                     |
| Cs <sub>3</sub> PO <sub>4</sub> | 13.46                                        | 12.78                   | 5.0%                     |

**Table S8.** Summary of IC results solid-liquid extractions of cesium ions by only adding 18-crown-6.

| Cesium salts                    | Initial Cs <sup>+</sup><br>concentration(mM) | After<br>extraction(mM) | Extraction<br>efficiency |
|---------------------------------|----------------------------------------------|-------------------------|--------------------------|
| CsCl                            | 4.33                                         | 1.40                    | 67.7%                    |
| CsNO <sub>3</sub>               | 5.16                                         | 3.56                    | 30.9%                    |
| Cs <sub>2</sub> CO <sub>3</sub> | 8.74                                         | 5.37                    | 38.6%                    |
| Cs <sub>2</sub> SO <sub>4</sub> | 8.03                                         | 6.75                    | 16.0%                    |
| Cs <sub>3</sub> PO <sub>4</sub> | 13.46                                        | 5.58                    | 58.5%                    |

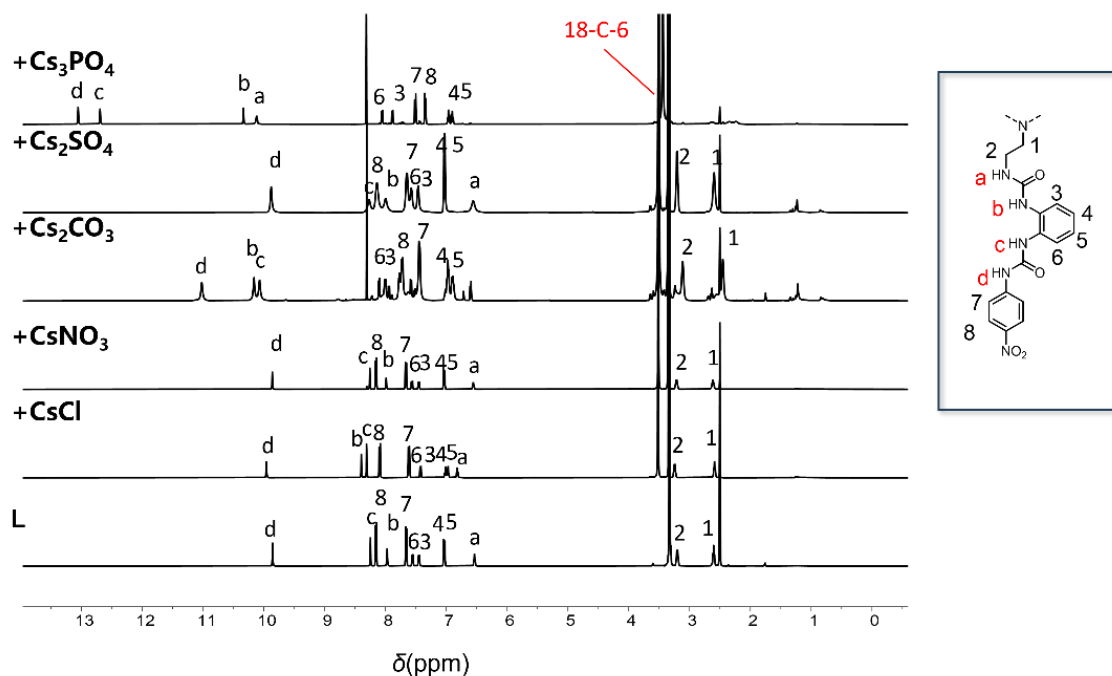

**Figure S17.** Stacked  $^1\text{H}$  NMR spectra of free hexaurea receptor recorded in the absence and presence of CsCl, CsNO<sub>3</sub>, Cs<sub>2</sub>CO<sub>3</sub>, Cs<sub>2</sub>SO<sub>4</sub>, Cs<sub>3</sub>PO<sub>4</sub> in DMSO-*d*<sub>6</sub> (400 MHz, 298 K). All spectra were recorded after allowing the solid phase and the organic phase to equilibrate for 0.5 h.

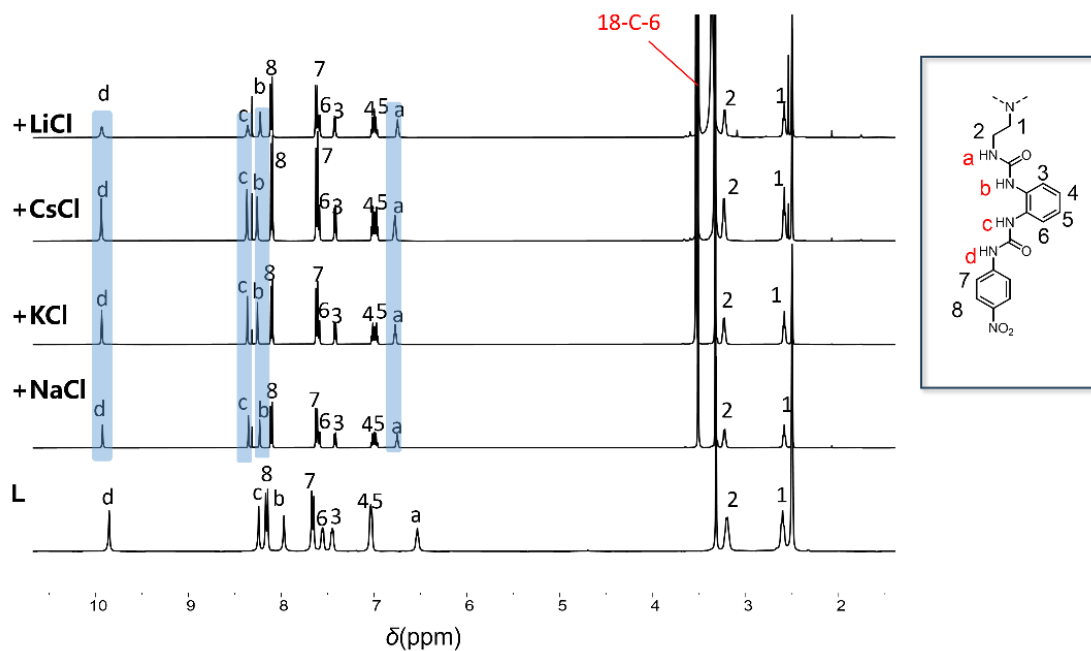

**Figure S18.** Stacked  $^1\text{H}$  NMR spectra of free hexaurea receptor recorded in the absence and presence of LiCl, CsCl, KCl, NaCl in DMSO-*d*<sub>6</sub> (400 MHz, 298 K).

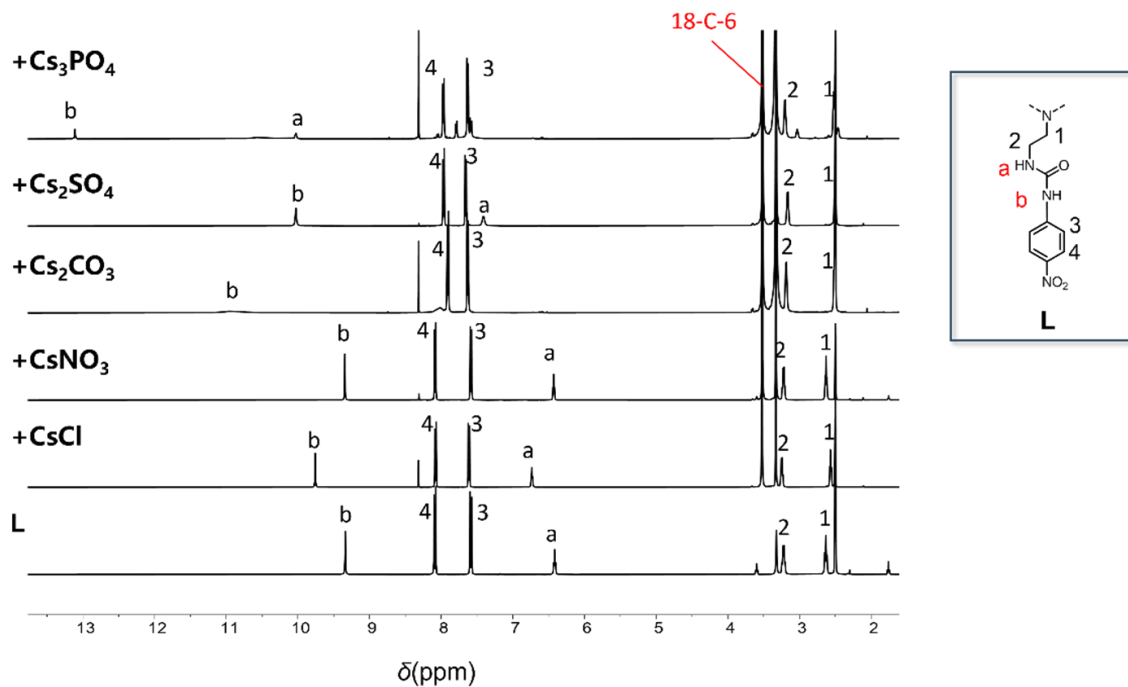

**Figure S19.** Stacked  $^1\text{H}$  NMR spectra of free trisurea receptor recorded in the absence and presence of  $\text{CsCl}$ ,  $\text{CsNO}_3$ ,  $\text{Cs}_2\text{CO}_3$ ,  $\text{Cs}_2\text{SO}_4$ ,  $\text{Cs}_3\text{PO}_4$  in  $\text{DMSO-}d_6$  (400 MHz, 298 K).

### S5. Mass spectrometry

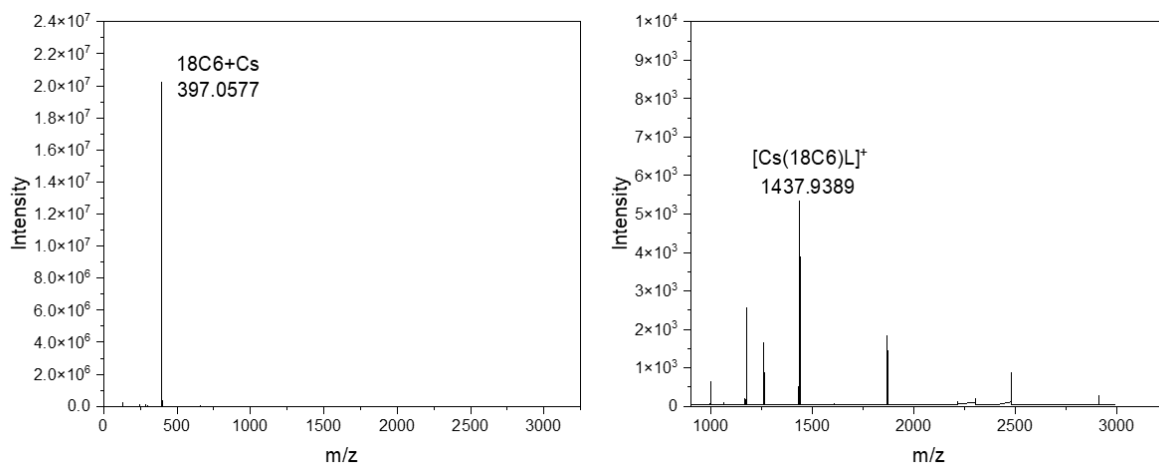

**Figure S20.** Full and enlarged ESI-MS spectra of  $[\text{L} \cdot (18\text{C}6) \cdot \text{CsCl}]$ .

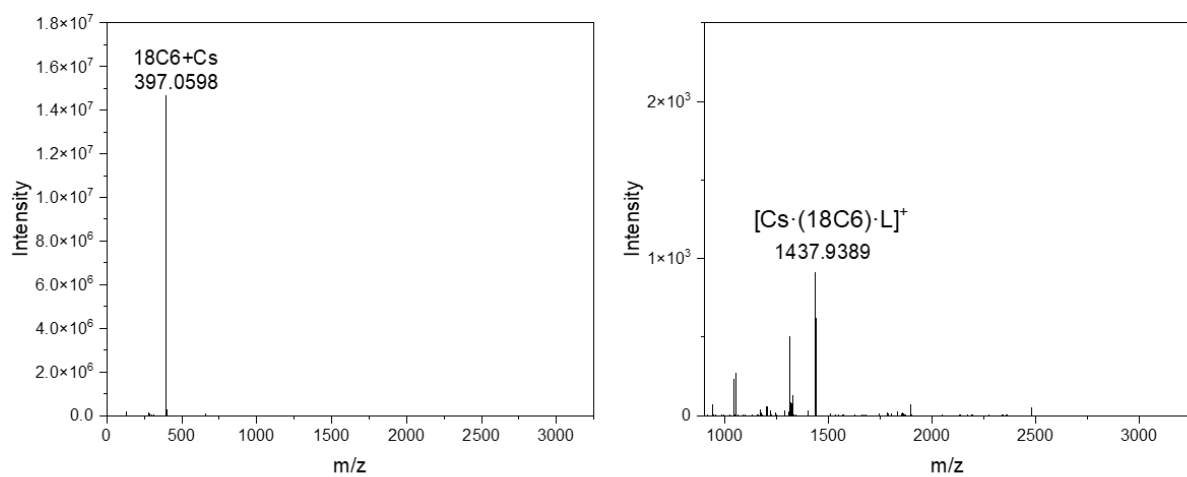

**Figure S21.** Full and enlarged ESI-MS spectra of  $[L \cdot (18C6) \cdot CsNO_3]$ .

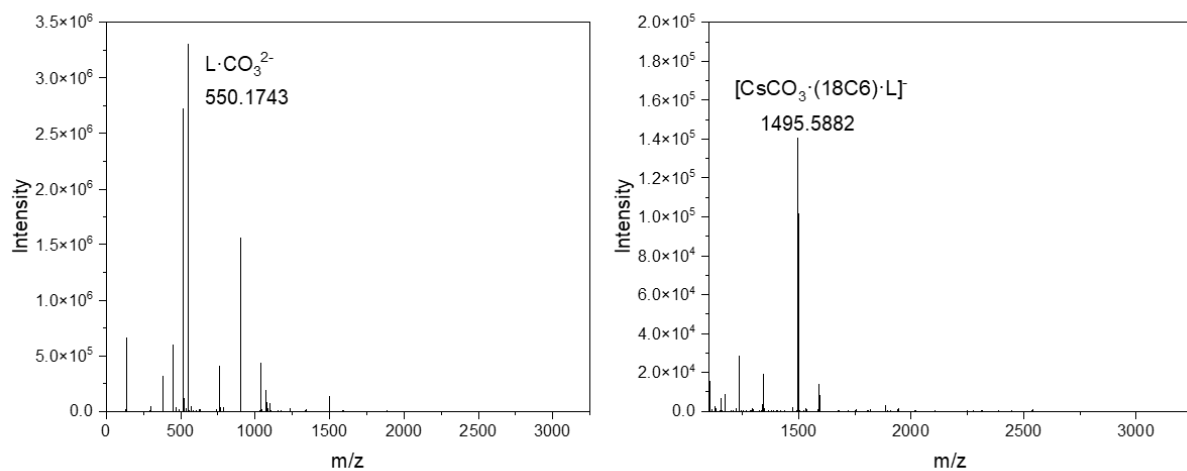

**Figure S22.** Full and enlarged ESI-MS spectra of  $[L \cdot (18C6) \cdot Cs_2CO_3]$ .

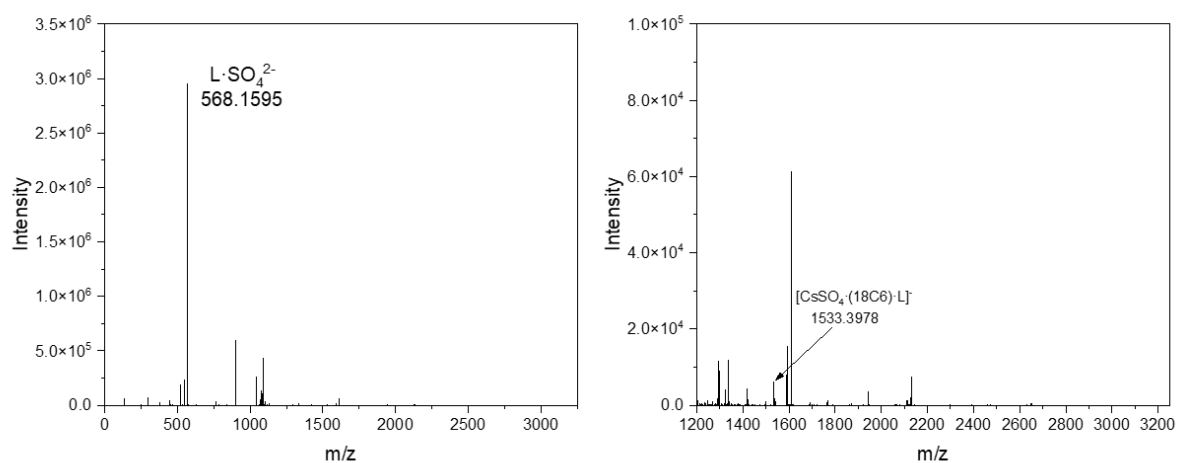

**Figure S23.** Full and enlarged ESI-MS spectra of  $[L \cdot (18C6) \cdot Cs_2SO_4]$ .

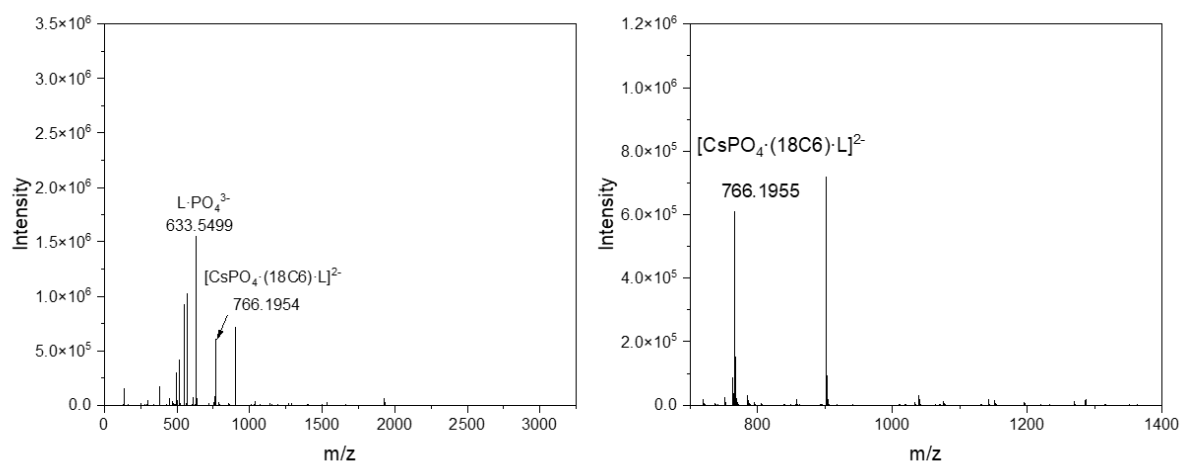

**Figure S24.** Full and enlarged ESI-MS spectra of  $[L \cdot (18C6) \cdot Cs_3PO_4]$ .

## S6. IGM analysis

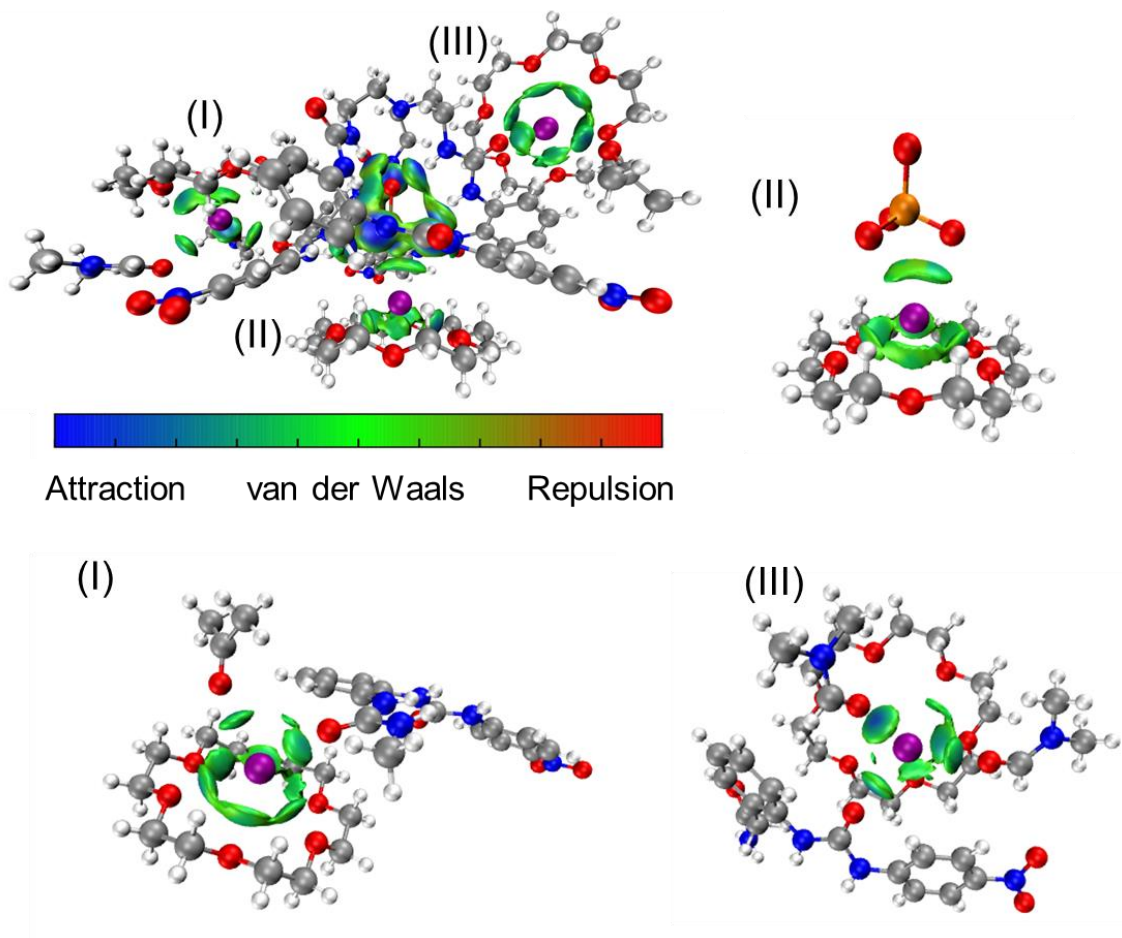

**Figure S25.** IGM plot of the  $\text{Cs}_3\text{PO}_4$  complex illustrating that medium attraction between 18-crown-6 complexed  $\text{Cs}^+$  and the phosphate complex. Color coding in the range of  $-0.5 < \rho \text{ sign}(\lambda_2) < 0.5$  a.u. Atom colors: green or grey = C, white = H, blue = N, red = O, orange = P, and purple = Cs.

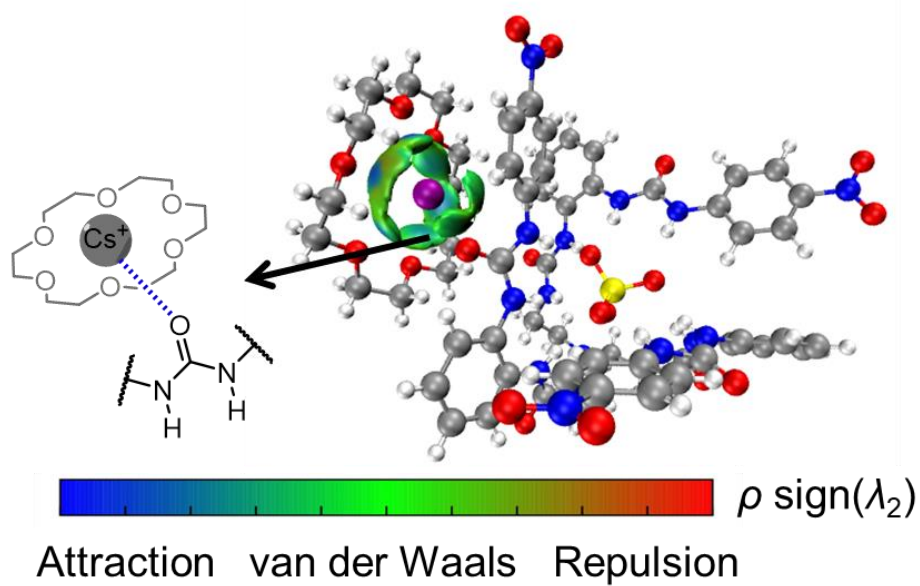

**Figure S26.** IGM plot of the  $\text{Cs}_2\text{SO}_4$  complex illustrating that medium attraction between 18-crown-6 complexed  $\text{Cs}^+$  and the  $\text{O}=\text{C}$  unit from the sulfate complex. Color coding in the range of  $-0.5 < \rho \text{ sign}(\lambda_2) < 0.5$  a.u. Atom colors: green or grey = C, white = H, blue = N, red = O, yellow = O, and purple = Cs.
